# Supplementary material
Source: PubMed Central journal article supplement (PMC8857315)
Supplement: 41396_2021_1125_MOESM1_ESM.pdf [file 41396_2021_1125_MOESM1_ESM.pdf]

# Supplementary figures

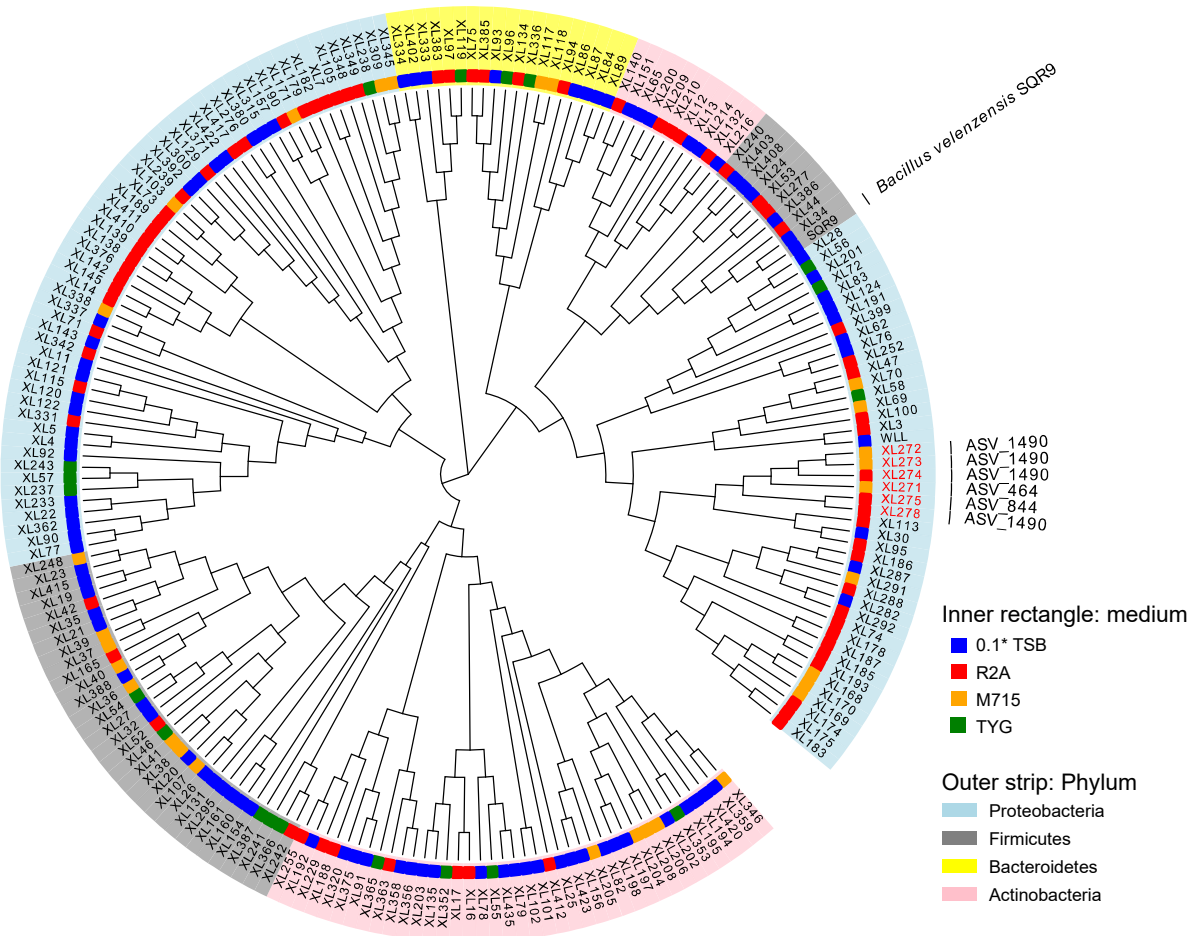

**Fig. S1** Cladogram showing phylogenetic relationships between 267 bacterial isolates obtained from cucumber rhizosphere inoculated with *B. velezensis* SQR9. Leaf labels indicate representative sequence IDs. Labels marked red represent *Pseudomonas* isolates. Inner ring represents the medium on which isolates were originally obtained. Outer strips indicate phylum-level taxonomy of isolates. Annotation texts are the ASVs matching to the isolates with highest sequence similarity.

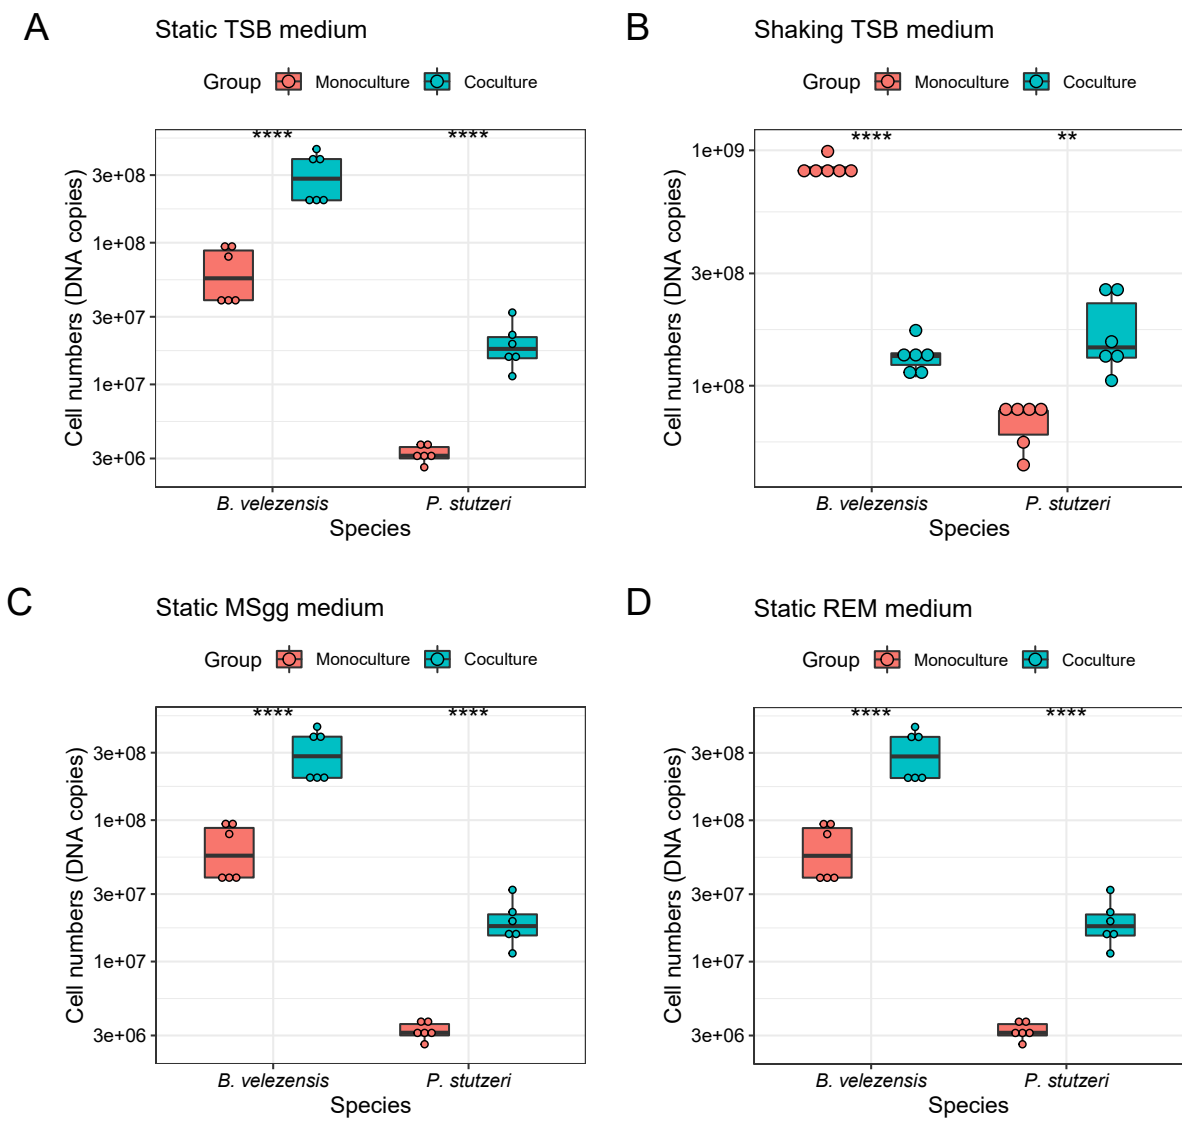

**Fig. S2 Cell numbers of *B. velezensis* SQR9 and *P. stutzeri* XL272 in monoculture and coculture.** They showed facilitation in static TSB and REM medium, while competition in shaking TSB medium and static MSgg medium. **(A)** Static TSB medium. **(B)** Shaking TSB medium. **(C)** Static MSgg medium. **(D)** Static REM medium. Asterisks indicate statistical significance according to unpaired student's *t* test via R: \*\**p* < 0.01 ; \*\*\**p* < 0.001.

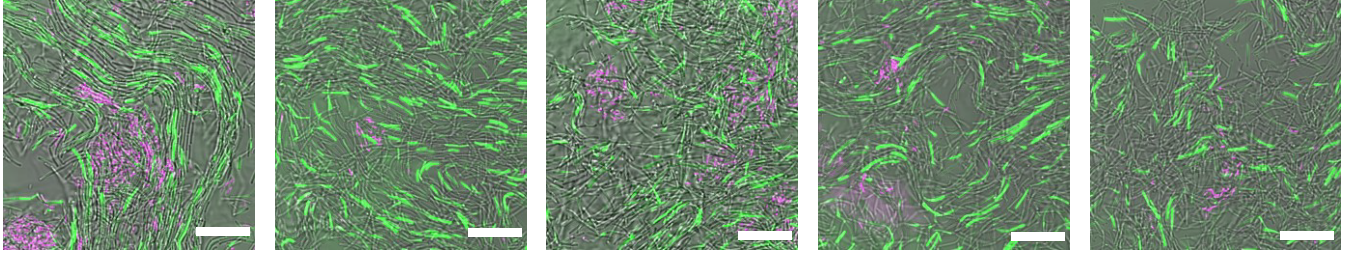

**Fig. S3 Cocultured biofilm.** Biofilm formed by *P. stutzeri* XL272 (magenta) and *B. velezensis* SQR9 (green) were viewed under the CLSM. These photos showed the heterogeneity of biofilm. Scale bar represents 20  $\mu\text{m}$ .

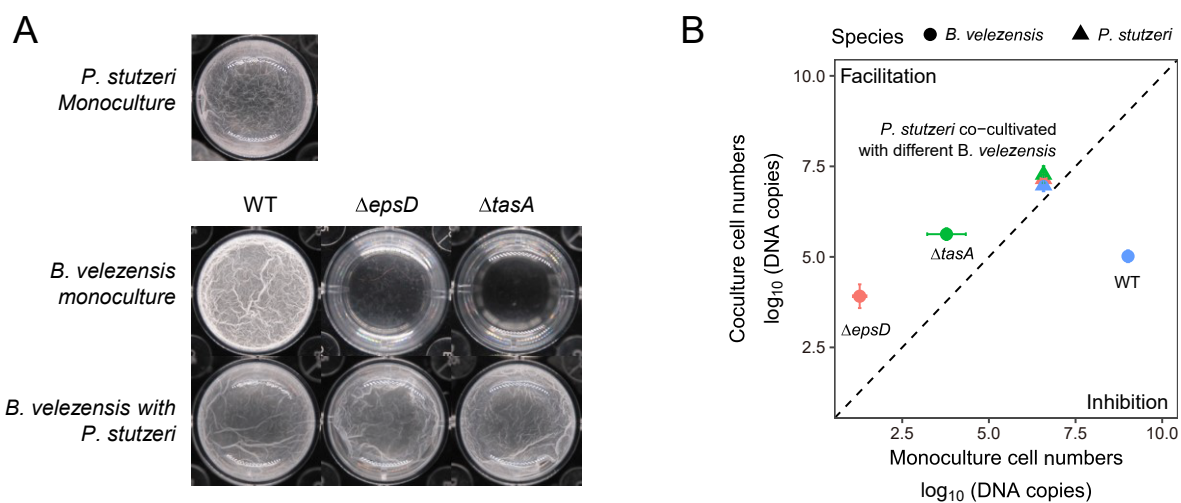

**Fig. S4 EPS and TasA are essential for interaction in MSgg minimal medium.** (A) Formation of pellicle biofilms by the mutants deficient in biosynthesis of exopolysaccharide EPS ( $\Delta epsD$ ) and TasA protein fibers ( $\Delta tasA$ ). Cells were incubated in MSgg at 30 °C for 24h before images were taken. Well diameter is 15.6 mm. (B) Cell numbers in dual species biofilm. Circle dots represent *B. velezensis*, triangles represent *P. stutzeri*. Colors indicate *B. velezensis* strain genotypes in coculture: WT (blue),  $\Delta epsD$  (pink),  $\Delta tasA$  (green). Data presented are the mean  $\pm$  s.d. (n = 6).



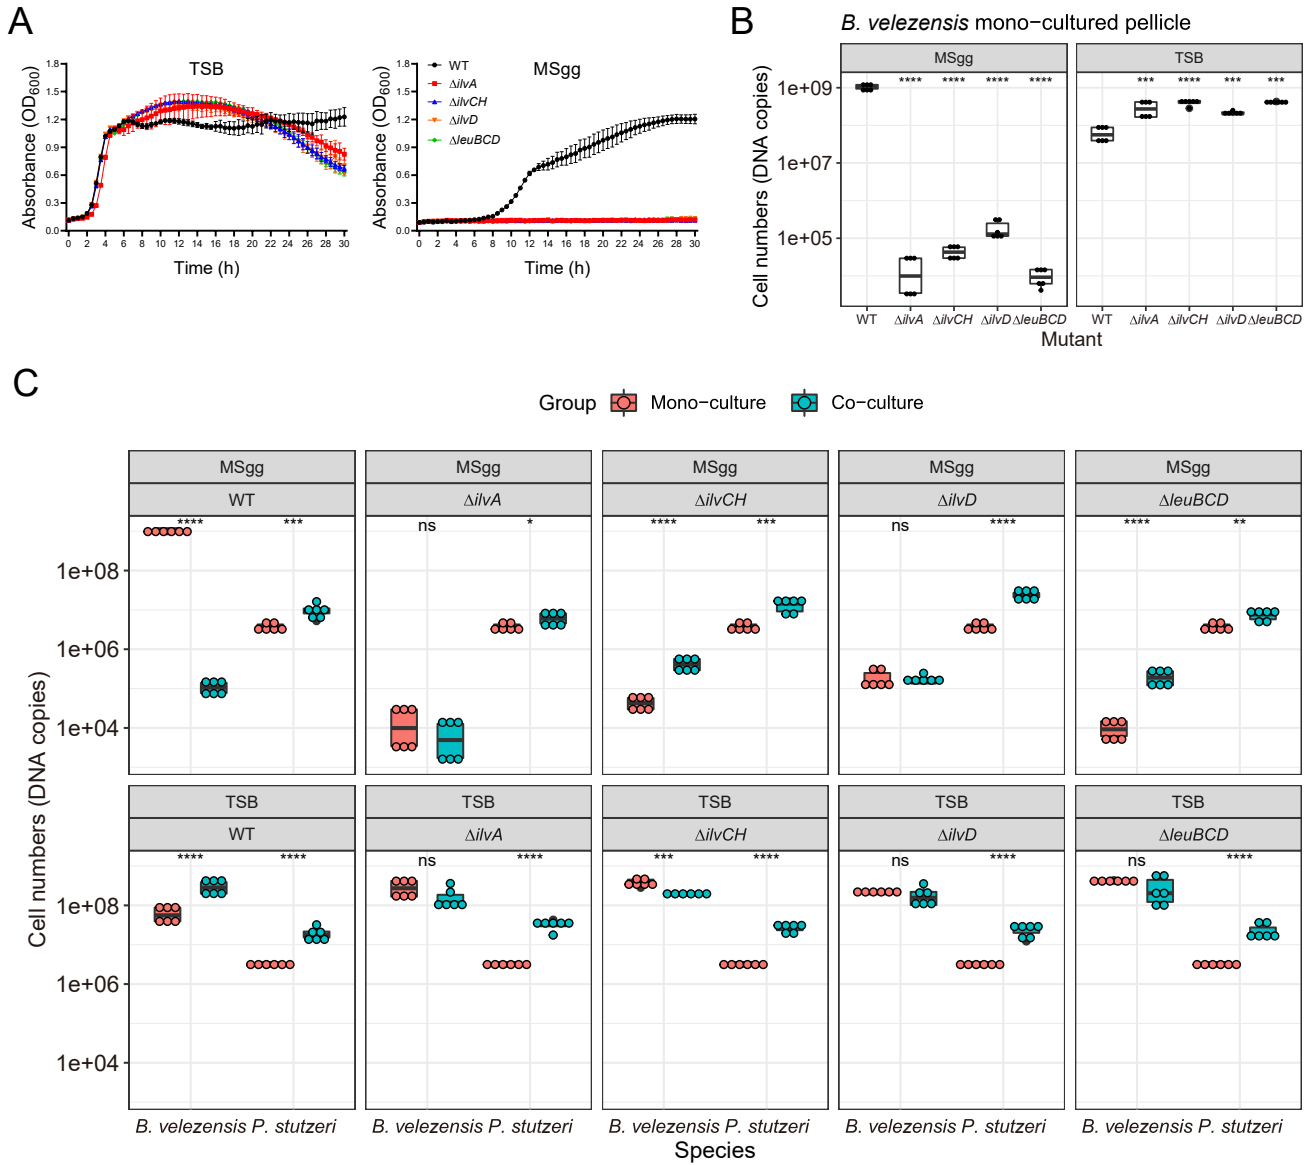

**Fig. S5 Ability to synthesize BCAAs are essential for *B. velezensis* SQR9 to survive in minimal medium but dispensable in rich medium.** (A) Growth curves of *B. velezensis* BCAAs biosynthetic mutants. (B) Cell numbers of *B. velezensis* mutants in monocultured pellicle. Asterisks indicate statistically significant ( $p < 0.01$ ) compared with wildtype according to unpaired student's t test via R. Well diameter is 15.6 mm. (C) Cell numbers of dual species biofilm. Upper title indicates the medium type, lower title indicates *B. velezensis* mutants. Data presented are the values of six replicates. Asterisks indicate statistical significance according to unpaired student's t test via R: \* $p < 0.05$ ; \*\* $p < 0.01$ .

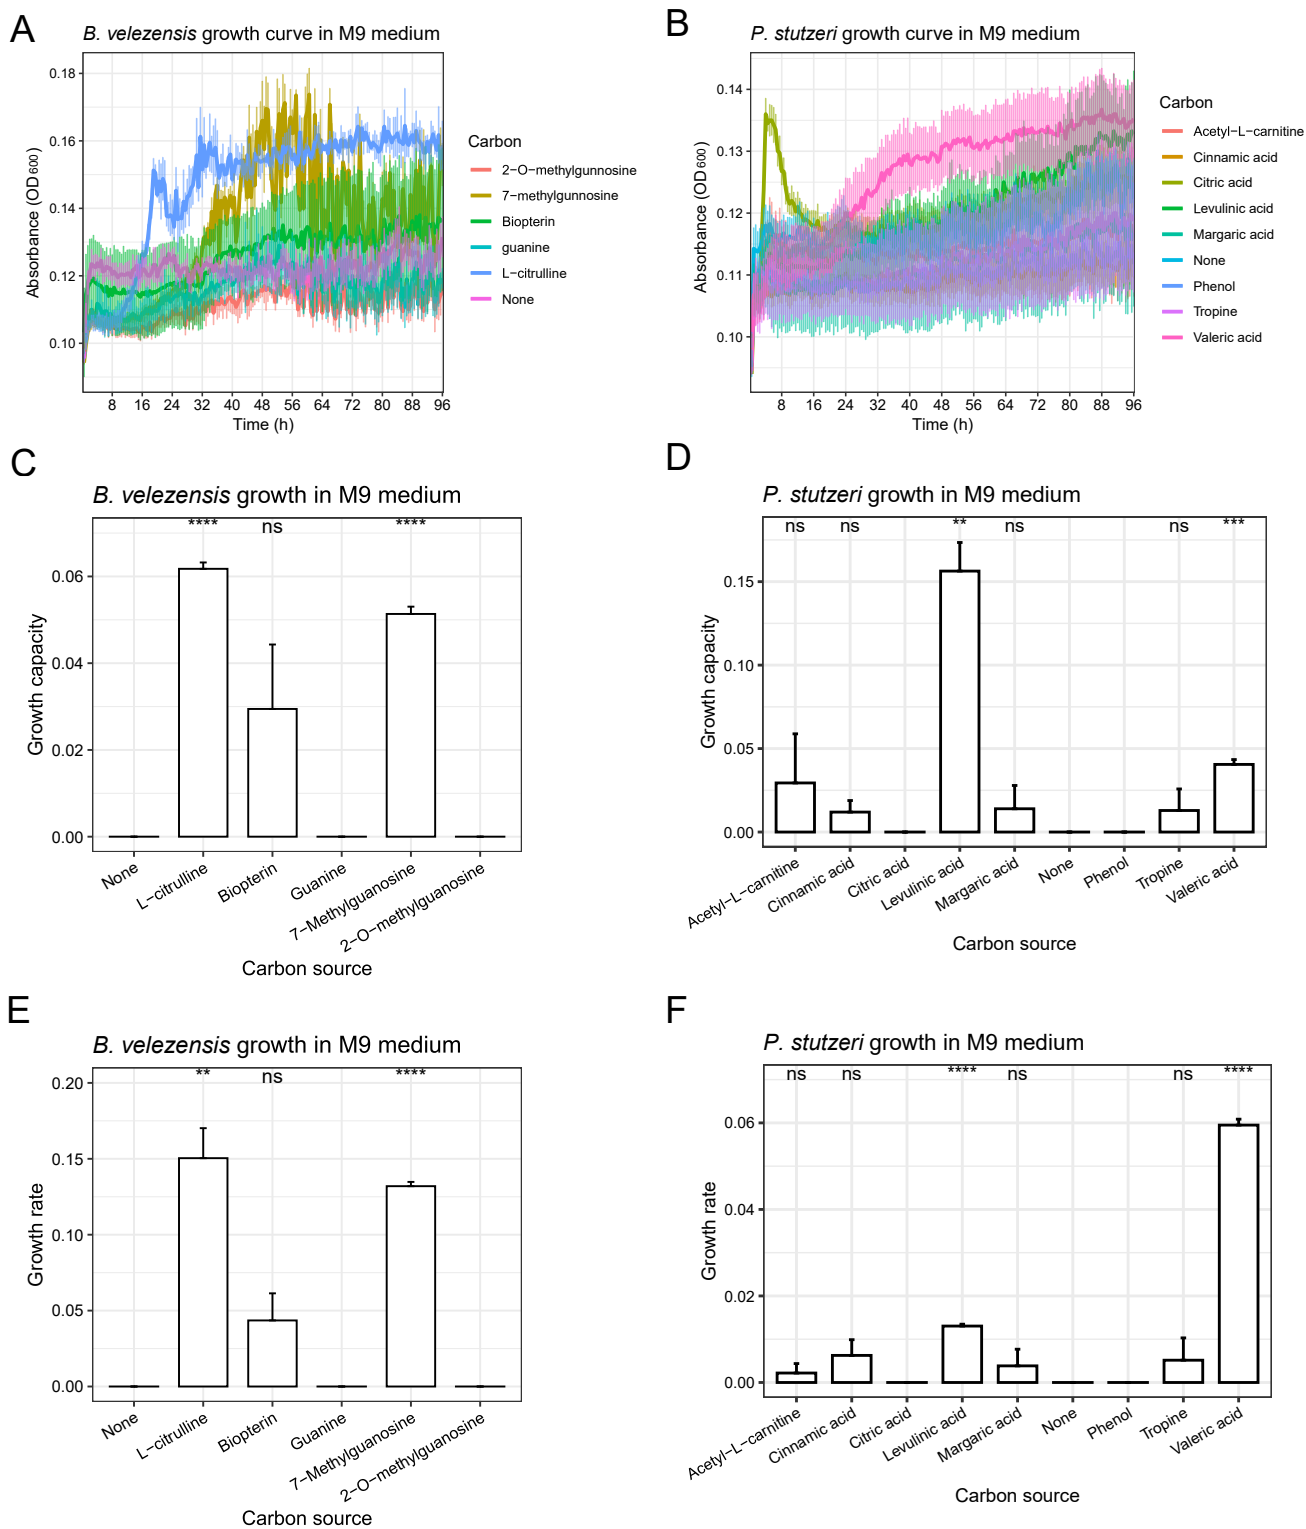

**Fig. S6 Growth kinetics on individual compounds. (A&B)** Growth curves of *B. velezensis* SQR9 and *P. stutzeri* XL272 grown in M9 medium with corresponding compounds as sole carbon sources. **(C&D)** Growth capacity is the maximum population size. The value is the maximum OD<sub>600</sub> subtract the initial OD<sub>600</sub>. **(E&F)** Growth rate is the slope of the growth curve at the exponential phase. Data presented are the mean ± s.d. (n = 5). Error bars represent standard deviations. Asterisks indicate statistical significance according to unpaired student's t test via R : \*\*p < 0.01, \*\*\*\*p < 0.001.

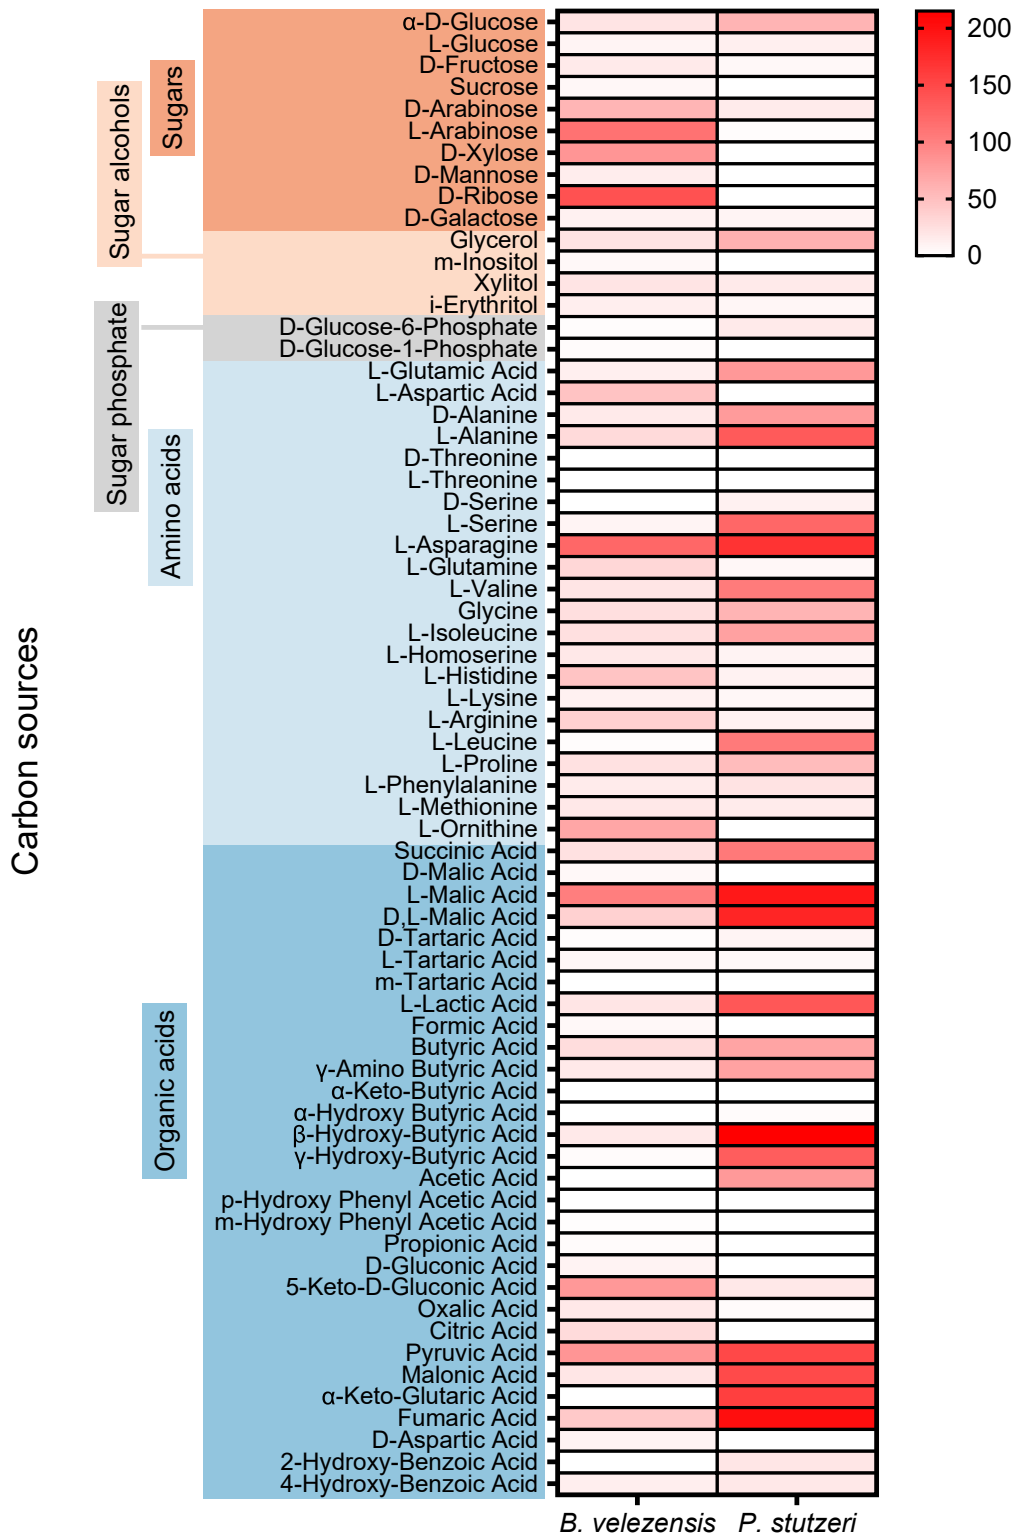

**Fig. S7 Differential utilization of root secreted carbon sources.** Heatmap colour indicates utilizing ability determined by Phenotype Microarray(PM) technology. Root secreted carbon sources come from the [1].

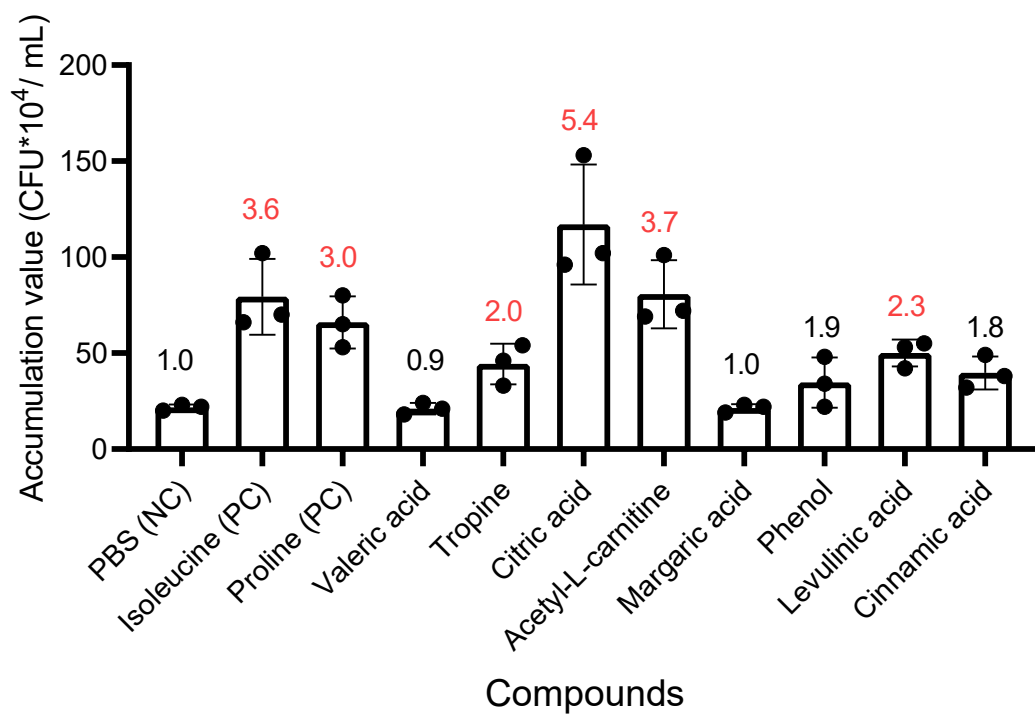

**Fig. S8 Chemotactic response of *P. stutzeri* XL272 towards several compounds secreted by *B. velezensis* SQR9.** Accumulation of bacteria in the capillaries was calculated as the average from the CFUs obtained in triplicate plates, and the results were expressed as the mean of at least three separate capillary assays for each determination. Error bars indicate the standard deviations based on three different replicates. Negative control is solvent PBS. Positive controls are isoleucine and proline. Numbers on top of each bar indicate the relative chemotactic indexes (RCI), RCI  $\geq 2$  indicates strong chemotactic response.

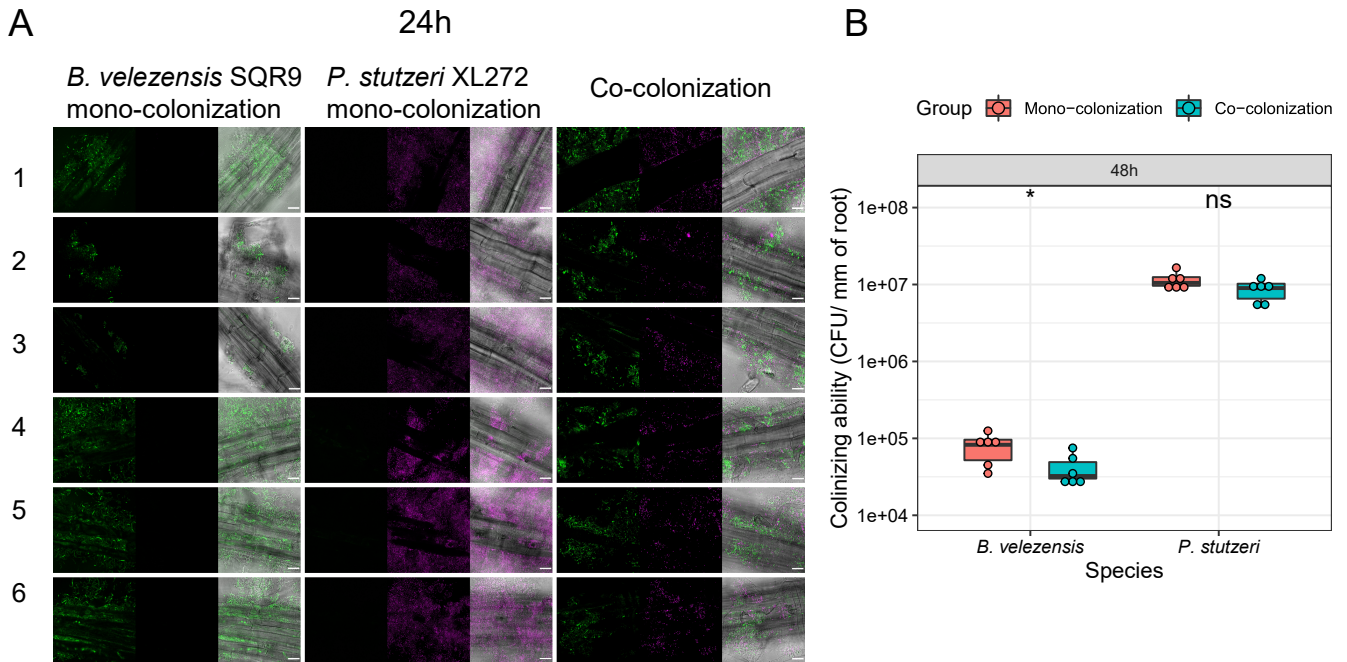

**Fig. S9 Colonization on *A. thaliana* roots. (A)** Colonization at 24h was visualized using CLSM. *B. velezensis* SQR9 (GFP, colored green), *P. stutzeri* XL272 (DsRed, false colored magenta). Scale bar represents 20  $\mu$ m. **(B)** Colonization at 48 h. Colonizing ability of the bacteria were measured as CFUs per millimeter of root ( $n = 6$ ) (see Methods). The samples were collected at 48 h. The colonizing ability of mono-colonization is compared with co-colonization. Asterisks indicate statistically significant ( $p < 0.01$ ) according to unpaired student's t test via R.

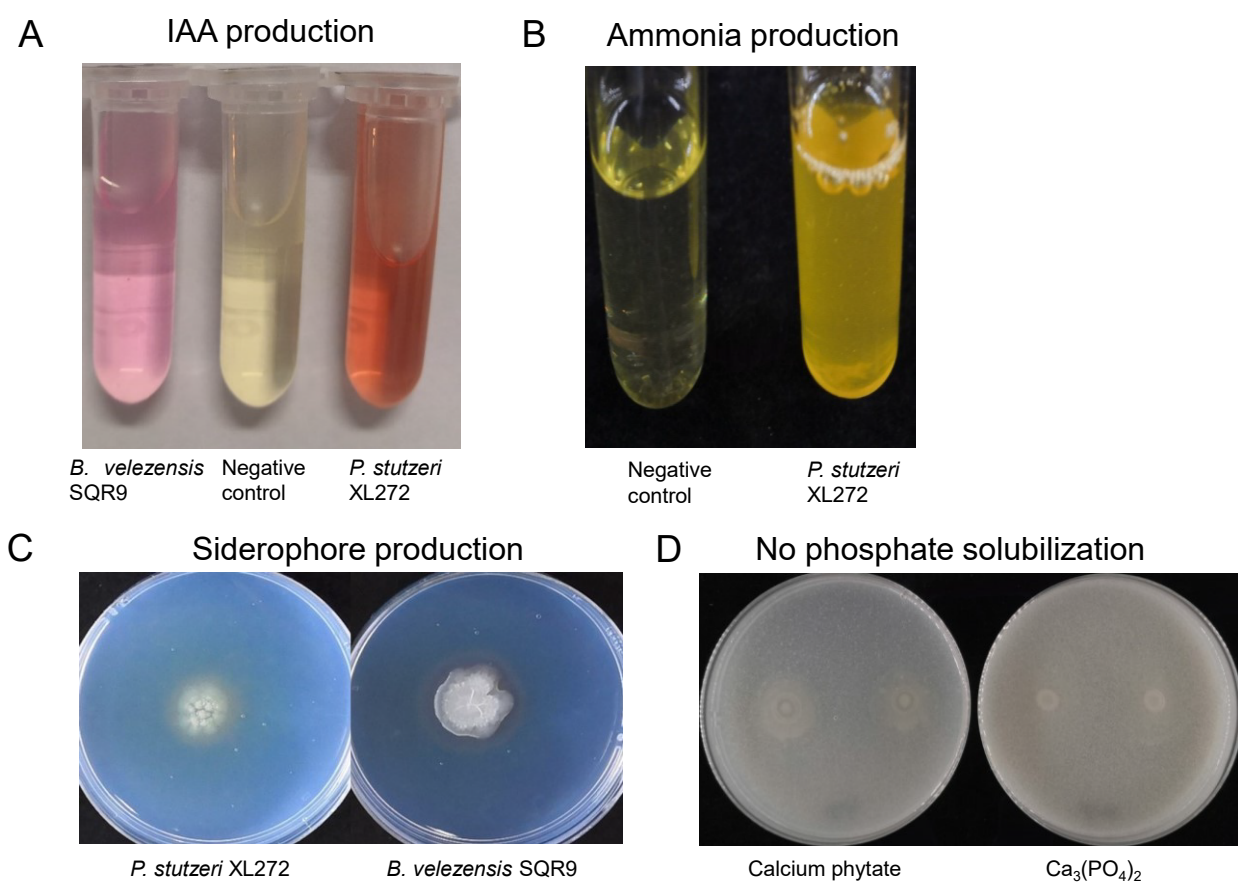

**Fig. S10 Plant-growth promoting traits of *P. stutzeri* XL272.** (A) *P. stutzeri* XL272 is capable of IAA production at a concentration of 12.23  $\mu\text{g}/\text{mL}$ . (B) *P. stutzeri* XL272 is tested positive for production of ammonia. (C) *P. stutzeri* XL272 is capable of siderophore production. (D) *P. stutzeri* XL272 can not solubilize phosphate. Plate diameter is 9 cm.

## Supplementary tables

**Table S1: Strains and plasmids used in this study:**

| Strains                                                                               | Description                                          | Source or reference |
|---------------------------------------------------------------------------------------|------------------------------------------------------|---------------------|
| <b><i>Bacillus velezensis</i> SQR9</b>                                                |                                                      |                     |
| SQR9                                                                                  | Wild type                                            | Lab sotck           |
| SQR9GFP                                                                               | Wild typeSQR9::gfp; cm <sup>R</sup>                  | Lab sotck           |
| $\Delta eps$                                                                          | <i>eps</i> ::cm <sup>R</sup>                         | Lab sotck           |
| $\Delta tasA$                                                                         | <i>tasA</i> ::cm <sup>R</sup>                        | Lab stock [2]       |
| $\Delta ilvA$                                                                         | <i>ilvA</i> ::cm <sup>R</sup>                        | This study          |
| $\Delta ilvCH$                                                                        | <i>ilvCH</i> ::cm <sup>R</sup>                       | This study          |
| $\Delta ilvD$                                                                         | <i>ilvD</i> ::cm <sup>R</sup>                        | This study          |
| $\Delta leuBCD$                                                                       | <i>leuBCD</i> ::cm <sup>R</sup>                      | This study          |
| <b><i>Pseudomonas stutzeri</i> XL272</b>                                              |                                                      |                     |
| XL272                                                                                 | Natural isolate, wild type                           | This study          |
| XL272-DsRed                                                                           | <i>attTn7</i> ::P <sub>A1/04/03</sub> - <i>dsRed</i> | This study          |
| gm <sup>R</sup> : gentamicin resistance, cm <sup>R</sup> : chloramphenicol resistance |                                                      |                     |
| <b>Other <i>Pseudomonas</i> spp.</b>                                                  |                                                      |                     |
| <i>Pseudomonas nitroreducens</i> XL271                                                | Natural isolate, wild type                           | This study          |
| <i>Pseudomonas stutzeri</i> XL273                                                     | Natural isolate, wild type                           | This study          |
| <i>Pseudomonas monteilii</i> XL274                                                    | Natural isolate, wild type                           | This study          |
| <i>Pseudomonas pseudoalcaligenes</i> XL275                                            | Natural isolate, wild type                           | This study          |
| <i>Pseudomonas resinovorans</i> XL278                                                 | Natural isolate, wild type                           | This study          |
| <b>Plasmids</b>                                                                       |                                                      |                     |
| pminiTn7(Gm)PA1/04/03-DsRedExpress-a                                                  | Mini-transposon delivery plasmid                     | [3]                 |
| pUX-BF13                                                                              | Mini-transposon helper plasmid                       | [3]                 |

**Table S2: Primers used in this study:**

| Primers | Sequence (from 5' to 3')         | Experimental purpose                                                            |
|---------|----------------------------------|---------------------------------------------------------------------------------|
| S_1F    | CAAATTGAGAAAAAGCTAAGCAA<br>ACCGA | To quantify the cell numbers of <i>B. velezensis</i> SQR9                       |
| S_1R    | TCTTCCCCGGTTAATTCGTATATGG<br>TA  | To quantify the cell numbers of <i>B. velezensis</i> SQR9                       |
| P_54F   | CGCGCCCAAAGTAGCAACTTAGAC<br>A    | To quantify the cell numbers of <i>P. stutzeri</i> XL272                        |
| P_54R   | CAATACGGGGAATATTTTCAGA<br>ACTCGG | To quantify the cell numbers of <i>P. stutzeri</i> XL272                        |
| IlvA_UF | CGTCCAGGTTCTCAGCCTT              | To amplify the upstream region of <i>ilvA</i> gene of <i>B. velezensis</i> SQR9 |

|           |                                              |                                                                                    |
|-----------|----------------------------------------------|------------------------------------------------------------------------------------|
| IlvA_UR   | CGTTACGTTATTAGTTATCCGCATT<br>GGTCGGCATTG     | To amplify the upstream region of <i>ilvA</i> gene of <i>B. velezensis</i> SQR9    |
| A_Spc-UF  | CAATGCCGACCAATGCGGATAACT<br>AATAACGTAACG     | Cloning                                                                            |
| A_Spc-UR  | CGGGAAACCATGCGCAGCGTATAA<br>TGTATGCTATA      | Cloning                                                                            |
| IlvA_DF   | TATAGCATAACATTATACGCTGCGC<br>ATGGTTTCCCG     | To amplify the downstream region of <i>ilvA</i> gene of <i>B. velezensis</i> SQR9  |
| IlvA_DR   | TAGCACGCCGCATTTTGAAG                         | To amplify the downstream region of <i>ilvA</i> gene of <i>B. velezensis</i> SQR9  |
| IlvA_F    | ACCGGTCAGAAAATCCCAGTT                        | To confirm deletion of <i>ilvA</i> gene in <i>B. velezensis</i> SQR9               |
| IlvA_R    | GGGATAAATCGTGCTGCCGG                         | To confirm deletion of <i>ilvA</i> gene in <i>B. velezensis</i> SQR9               |
| IlvCH_UF  | CTGACATGAAGCGCAACGGC                         | To amplify the upstream region of <i>ilvCH</i> gene of <i>B. velezensis</i> SQR9   |
| IlvCH_UR  | CGTTACGTTATTAGTTATCAATGCG<br>ATCAATGCAAGCG   | To amplify the upstream region of <i>ilvCH</i> gene of <i>B. velezensis</i> SQR9   |
| CH_Spc-UF | CGCTTGCATTGATCGCATTGATAA<br>CTAATAACGTAACG   | Cloning                                                                            |
| CH_Spc-UR | AGCATCACTGTAGGCCACACCGTA<br>TAATGTATGCTATA   | Cloning                                                                            |
| IlvCH_DF  | TATAGCATAACATTATACGGTGTGG<br>CCTACAGTGATGCT  | To amplify the downstream region of <i>ilvCH</i> gene of <i>B. velezensis</i> SQR9 |
| IlvCH_DR  | GCAAATACCGGTAGCGCACA                         | To amplify the downstream region of <i>ilvCH</i> gene of <i>B. velezensis</i> SQR9 |
| IlvCH_F   | CTGACAAGATCACTCGTCCGC                        | To confirm deletion of <i>ilvCH</i> gene in <i>B. velezensis</i> SQR9              |
| IlvCH_R   | CATGAGATCAGCCTTCCGGG                         | To confirm deletion of <i>ilvCH</i> gene in <i>B. velezensis</i> SQR9              |
| IlvD_UF   | CTTTGCGCGGAACATCGC                           | To amplify the upstream region of <i>ilvD</i> gene of <i>B. velezensis</i> SQR9    |
| IlvD_UR   | CGTTACGTTATTAGTTATGGACGT<br>ACAAGTGCCTGAAGAA | To amplify the upstream region of <i>ilvD</i> gene of <i>B. velezensis</i> SQR9    |
| D_Spc-UF  | TTCTTCAGGCACTTGTACGTCCATA<br>ACTAATAACGTAACG | Cloning                                                                            |
| D_Spc-UR  | GGCGGTGTGCCTTTTGAATCGTAT<br>AATGTATGCTATA    | Cloning                                                                            |
| IlvD_DF   | TATAGCATAACATTATACGATTCAA<br>AAGGCACACCGCC   | To amplify the downstream region of <i>ilvD</i> gene of <i>B. velezensis</i> SQR9  |
| IlvD_DR   | CTGACAGAAGCAGCCGCACA                         | To amplify the downstream region of <i>ilvD</i> gene of <i>B. velezensis</i> SQR9  |
| IlvD_F    | CGGTTTGGAGCTGCTCCATT                         | To confirm deletion of <i>ilvD</i> gene in <i>B. velezensis</i> SQR9               |
| IlvD_R    | CTTCAGGCCGCCTACAGTGA                         | To confirm deletion of <i>ilvD</i> gene in <i>B. velezensis</i> SQR9               |
| LeuBCD_UF | GATGTGCGCCCGGATCTTGA                         | To amplify the upstream region of <i>leuBCD</i> gene of <i>B. velezensis</i> SQR9  |
| LeuBCD_UR | CGTTACGTTATTAGTTAT<br>AGTGGAATAACTCGCCGGT    | To amplify the upstream region of <i>leuBCD</i> gene of <i>B. velezensis</i> SQR9  |
| Spc-UF    | ACCGGCGAGTTTTTCCACTATAA<br>CTAATAACGTAACG    | Cloning                                                                            |
| Spc-UR    | AAGCGTTGCCGAACAATTCG<br>CGTATAATGTATGCTATA   | Cloning                                                                            |



|              |                                             |                                                                                      |
|--------------|---------------------------------------------|--------------------------------------------------------------------------------------|
| LeuBCD<br>DF | TATAGCATACATTATACG<br>CGAATTGTTTCGGCAACGCTT | To amplify the downstream region of <i>leuBCD</i> gene of <i>B. velezensis</i> SQR9  |
| LeuBCD<br>DR | AGCCGGGTAAAGCTCTCAGC                        | To amplify the downstream region of <i>leuBCD</i> gene of <i>B. velezensis</i> SQR9  |
| LeuBCD<br>F  | TCGGAACCGCGGTCATTGAA                        | To confirm deletion of <i>leuBCD</i> gene in <i>B. velezensis</i> SQR9               |
| LeuBCD<br>R  | AACCTGCCGGACACTGTAGG                        | To confirm deletion of <i>leuBCD</i> gene in <i>B. velezensis</i> SQR9               |
| IlvA_SF      | CCCAAGTGGAAGTGTTCGG                         | To quantify the relative expression of <i>ilvA</i> gene in <i>B. velezensis</i> SQR9 |
| IlvA_SR      | AAATTCGATGGCAGCCGT                          | To quantify the relative expression of <i>ilvA</i> gene in <i>B. velezensis</i> SQR9 |
| IlvC_SF      | GTGCCTCCTGCTGATGTG                          | To quantify the relative expression of <i>ilvC</i> gene in <i>B. velezensis</i> SQR9 |
| IlvC_SR      | GTTTCAAGAACGCCGCA                           | To quantify the relative expression of <i>ilvC</i> gene in <i>B. velezensis</i> SQR9 |
| IlvD_SF      | GGCTCACTGGTTTGACGG                          | To quantify the relative expression of <i>ilvD</i> gene in <i>B. velezensis</i> SQR9 |
| IlvD_SR      | TTCCCGGCTTGATATGCG                          | To quantify the relative expression of <i>ilvD</i> gene in <i>B. velezensis</i> SQR9 |
| IlvE_SF      | GGGTGTTGATGTTCCGTCC                         | To quantify the relative expression of <i>ilvE</i> gene in <i>B. velezensis</i> SQR9 |
| IlvE_SR      | GTCGCAATTACAAACGGACG                        | To quantify the relative expression of <i>ilvE</i> gene in <i>B. velezensis</i> SQR9 |
| IlvH_SF      | GGATCACCGGCCTGTTTACA                        | To quantify the relative expression of <i>ilvH</i> gene in <i>B. velezensis</i> SQR9 |
| IlvH_SR      | TGCCAGCTCACGCTGTAC                          | To quantify the relative expression of <i>ilvH</i> gene in <i>B. velezensis</i> SQR9 |
| leuA_SF      | GCCCGATCTGTCAAAGGTG                         | To quantify the relative expression of <i>leuA</i> gene in <i>B. velezensis</i> SQR9 |
| leuA_SR      | GCTGACCATTTGAACGATCGG                       | To quantify the relative expression of <i>leuA</i> gene in <i>B. velezensis</i> SQR9 |
| leuB_SF      | AAGATCCGACGCCATCCT                          | To quantify the relative expression of <i>leuB</i> gene in <i>B. velezensis</i> SQR9 |
| leuB_SR      | TTACAAAGTCGACGCCGCT                         | To quantify the relative expression of <i>leuB</i> gene in <i>B. velezensis</i> SQR9 |
| leuC_SF      | GGTCTGACACTTCCGGGGA                         | To quantify the relative expression of <i>leuC</i> gene in <i>B. velezensis</i> SQR9 |
| leuC_SR      | TGACATCCTTCGCGGTCAC                         | To quantify the relative expression of <i>leuC</i> gene in <i>B. velezensis</i> SQR9 |
| leuD_SF      | CGGTGAGCCTGATCCTGAA                         | To quantify the relative expression of <i>leuD</i> gene in <i>B. velezensis</i> SQR9 |
| leuD_SR      | CGGATGGGAAGCATACCGTT                        | To quantify the relative expression of <i>leuD</i> gene in <i>B. velezensis</i> SQR9 |
| RecA_SF      | AAAAAACAAGTCGCTCCTCCG                       | To amplify the <i>recA</i> reference gene in <i>B. velezensis</i> SQR9               |
| ReckA_S<br>R | CGATATCCAGTTCAGTTCCAAG                      | To amplify the <i>recA</i> reference gene in <i>B. velezensis</i> SQR9               |
| IlvA_PF      | GCTGAAGCTGGTCGAGGAGAA                       | To quantify the relative expression of <i>ilvA</i> gene in <i>P. stutzeri</i> XL272  |
| IlvA_PR      | GCTGACGCAGGATTTCCATCG                       | To quantify the relative expression of <i>ilvA</i> gene in <i>P. stutzeri</i> XL272  |
| IlvC_PF      | CGCCAAGATGTTTCATCACCGAA                     | To quantify the relative expression of <i>ilvC</i> gene in <i>P. stutzeri</i> XL272  |

|             |                        |                                                                                     |
|-------------|------------------------|-------------------------------------------------------------------------------------|
| IlvC_PR     | AGCTTCTCGCCGACCACTTC   | To quantify the relative expression of <i>ilvC</i> gene in <i>P. stutzeri</i> XL272 |
| IlvD_PF     | CCACATGGAAGACGTGCAC    | To quantify the relative expression of <i>ilvD</i> gene in <i>P. stutzeri</i> XL272 |
| IlvD_PR     | TCCCATTCGGCGATGGCA     | To quantify the relative expression of <i>ilvD</i> gene in <i>P. stutzeri</i> XL272 |
| IlvE_PF     | CAACCTGAAGGTGCACGTG    | To quantify the relative expression of <i>ilvE</i> gene in <i>P. stutzeri</i> XL272 |
| IlvE_PR     | GCGGGTCATGGTGATGTTG    | To quantify the relative expression of <i>ilvE</i> gene in <i>P. stutzeri</i> XL272 |
| IlvH_PF     | GGCCACGAGGAGGTGATC     | To quantify the relative expression of <i>ilvH</i> gene in <i>P. stutzeri</i> XL272 |
| IlvH_PR     | GCCGGTAGCCTTGACCTT     | To quantify the relative expression of <i>ilvH</i> gene in <i>P. stutzeri</i> XL272 |
| leuA_PF     | GCCTACCAGCCGCAGATCAT   | To quantify the relative expression of <i>leuA</i> gene in <i>P. stutzeri</i> XL272 |
| leuA_PR     | CTCCAGCAGCGGAATGAACAC  | To quantify the relative expression of <i>leuA</i> gene in <i>P. stutzeri</i> XL272 |
| leuB_PF     | ATATCCGCAACTGGCCGA     | To quantify the relative expression of <i>leuB</i> gene in <i>P. stutzeri</i> XL272 |
| leuB_PR     | CATTCTCGAGCACCTTGC     | To quantify the relative expression of <i>leuB</i> gene in <i>P. stutzeri</i> XL272 |
| leuC_PF     | GCTTGCCGATGTAGTCCGAAAC | To quantify the relative expression of <i>leuC</i> gene in <i>P. stutzeri</i> XL272 |
| leuC_PR     | GCACTGAAGACCACTCCGTTC  | To quantify the relative expression of <i>leuC</i> gene in <i>P. stutzeri</i> XL272 |
| leuD_PF     | AGATTCACGGTGCGGATGC    | To quantify the relative expression of <i>leuD</i> gene in <i>P. stutzeri</i> XL272 |
| leuD_PR     | TTGTTGCGCTCGCCCTGA     | To quantify the relative expression of <i>leuD</i> gene in <i>P. stutzeri</i> XL272 |
| RpoD_PF     | TCCTCAGCGGCTACATCG     | To amplify the <i>rpoD</i> reference gene in <i>P. stutzeri</i> XL272               |
| RpoD_P<br>R | TTATCGTCGGCAACCGGC     | To amplify the <i>rpoD</i> reference gene in <i>P. stutzeri</i> XL272               |

**Table S3: Water-solubility of the compounds and concentration provided as sole carbon source in M9 medium:**

| Compound             | Water Solubility | Concentration |
|----------------------|------------------|---------------|
| Glucose              | Soluble          | 10 g/L        |
| L-citrulline         | Soluble          | 10 g/L        |
| Biopterin            | 0.1 mg/L         | 0.1 mg/L      |
| Guanine              | Insoluble        | < 0.1 mg/L    |
| 7-methylguanosine    | 5.61 mg/mL       | 5.61 mg/mL    |
| 2'-O-methylguanosine | Insoluble        | < 0.1 mg/L    |
| Acetyl-L-carnitine   | 0.355 mg/mL      | 0.355 mg/mL   |
| Valeric acid         | 49.7 mg/L        | 49.7 mg/L     |
| Tropine              | Soluble          | 10 g/L        |
| Cinnamic acid        | 0.62 g/L         | 0.62 g/L      |
| Phenol               | Soluble          | 10 g/L        |
| Margaric acid        | Insoluble        | < 0.1 mg/L    |
| Citric acid          | Soluble          | 10 g/L        |
| Levulinic acid       | Soluble          | 10 g/L        |

## References

1. Sasse J, Martinoia E, Northen T. Feed your friends: do plant exudates shape the root microbiome? *Trends Plant Sci* 2018. **23**: 25–41
2. Xu Z, Mandic-Mulec I, Zhang H, Liu Y, Sun X, Feng H, et al. Antibiotic bacillomycin D affects iron acquisition and biofilm formation in *Bacillus velezensis* through a Btr-mediated FeuABC-dependent pathway. *Cel Rep* 2019; **29**: 1192-1202.
3. Lambertsen L, Sternberg C, Molin S. Mini-Tn7 transposons for site-specific tagging of bacteria with fluorescent proteins. *Environ Microbiol* 2004; **6**: 726–732.
